# Supplementary material
Source: PubMed Central journal article supplement (PMC3409776)
Supplement: 1205207109_pnas.201205207SI.pdf [file 1205207109_pnas.201205207SI.pdf]

# Supporting Information

Qian et al. 10.1073/pnas.1205207109

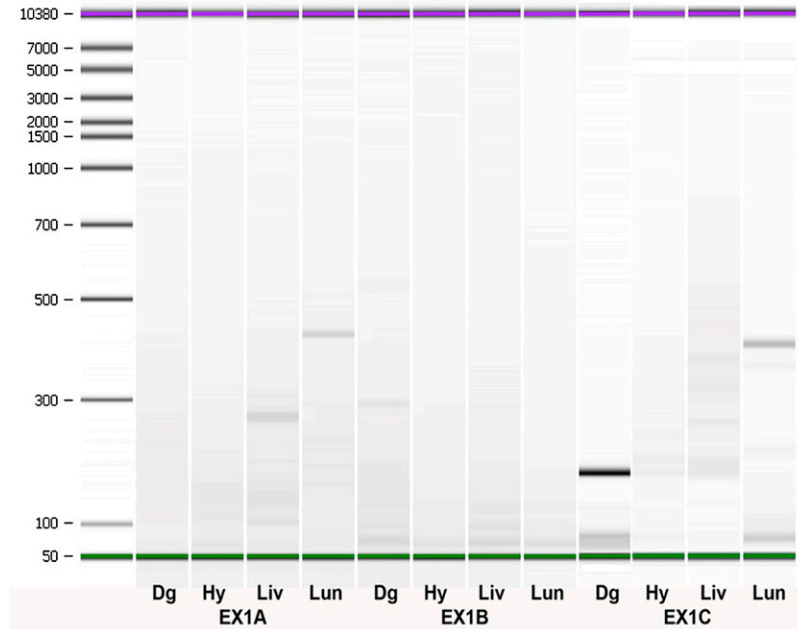

Fig. S1. Electrophoresis results of the nested PCR targeting TSS upstream of exon 2. RNAs used in CapFishing were extracted from the following tissues: dentate gyrus (Dg), hypothalamus (Hy), liver (Liv), and lung (Lun).

Table S1. Sequence of primers used in nested PCR

| Name           | Sequence (5'→3')        | Application            |
|----------------|-------------------------|------------------------|
| 5' RACE primer | GTCTACCAGGCATTTCGCTTCAT | 5' RACE PCR            |
| 3'-GAPDH-R     | TGAGCCCTCCACAATGCCA     | 5' RACE PCR control    |
| EX1A1R         | CATTTGTGTTGTTACGGTTCGG  | 3' target outer primer |
| P1-1R          | TGGGAACCTGATGACATCCAG   | 3' target inner primer |
| EX1B R         | TGGGCGTGCCCGGT          | 3' target outer primer |
| P2-1R          | AGTGCGATGTTCAACAATCC    | 3' target inner primer |
| P3 RTmR        | CAGCGAATGTCTCAGTGTC     | 3' target outer primer |
| P3-858R        | CAGTTCTCCGATTGGGAG      | 3' target inner primer |
| EX3 U1-R       | TGGAGTAAGAGGACACTTGC    | 3' target inner primer |
| EX3-R          | CATTCTGCTGATGAATCTG     | 3' target outer primer |
| EX4-48R        | TCTAACACAGTTACGGTTAC    | 3' target inner primer |
| EX4-71R        | CTGTAACACAAGCCAGGGTC    | 3' target outer primer |
| EX5-R          | CTCACGTTGTCAAGAAGCAG    | 3' target inner primer |
| EX6-15R        | CTCAGGATAACAGGTCCTGTC   | 3' target outer primer |

Primers in green, pink, blue, and red represent 3' primer pairs targeting exons 1A, 1B, 1C, and 3–6, respectively.
